# Supplementary material
Source: publisher site journal article supplement (https://www.dovepress.com/article/556772)
Supplement: Supplementary file 1 [file 556772%20Supplementary%20Table%201.docx]

**Supplementary Table 1 Characteristics of participants in the training set and the validation set.**

| Variables | Training set | Validation set | P value |
| --- | --- | --- | --- |
| N | 208 | 87 |  |
| Marital status |  |  | 0.576 |
| Married | 187 | 75 |  |
| Divorced | 5 | 2 |  |
| Widowed | 16 | 10 |  |
| Insurance status |  |  | 0.495 |
| Local Medical Insurance | 104 | 39 |  |
| Non-local Medical Insurance | 104 | 48 |  |
| Household registration |  |  | 0.181 |
| Countryside | 36 | 9 |  |
| City | 172 | 78 |  |
| Seasonality of admission |  |  | 0.858 |
| Spring | 64 | 31 |  |
| Summer | 48 | 20 |  |
| Fall | 56 | 21 |  |
| Winter | 40 | 15 |  |
| Seasonality of discharge |  |  | 0.25 |
| Spring | 63 | 35 |  |
| Summer | 51 | 21 |  |
| Fall | 57 | 22 |  |
| Winter | 37 | 9 |  |
